# Supplementary material for: Plasma Exchange in Patients With Severe Coronavirus Disease 2019: A Single-Center Experience
Source: PubMed Central journal article supplement — Crit Care Explor. 2021 Aug 20;3(8):e0517. doi: 10.1097/CCE.0000000000000517 (PMC8382335; doi:10.1097/cce.0000000000000517), 2021-08-20
Supplement: cc9-3-e0517-s001.pdf [file cc9-3-e0517-s001.pdf]

**Online Supplemental Digital Content of “Plasma exchange in patients with severe COVID-19: A single center experience”**

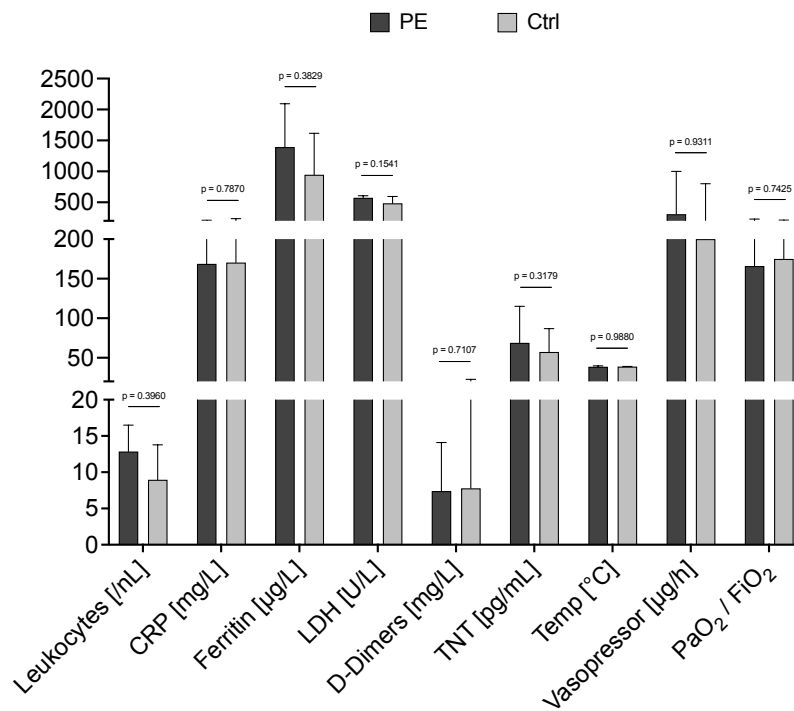

**Figure S1.** Comparison of laboratory and clinical parameters between plasma exchange and control group at the start of plasma exchange or observation.

*CRP* C-reactive protein, *Ctrl* control group, *FiO<sub>2</sub>* fraction of inspired oxygen, *LDH* lactate dehydrogenase, *PaO<sub>2</sub>* partial pressure of arterial oxygen, *PE* plasma exchange group, *TnT* troponin T. Results are given as median and 95% confidence interval. Kruskal-Wallis test was used for statistical analyses. Bold values are statistically significant for  $p \leq 0.05$ .

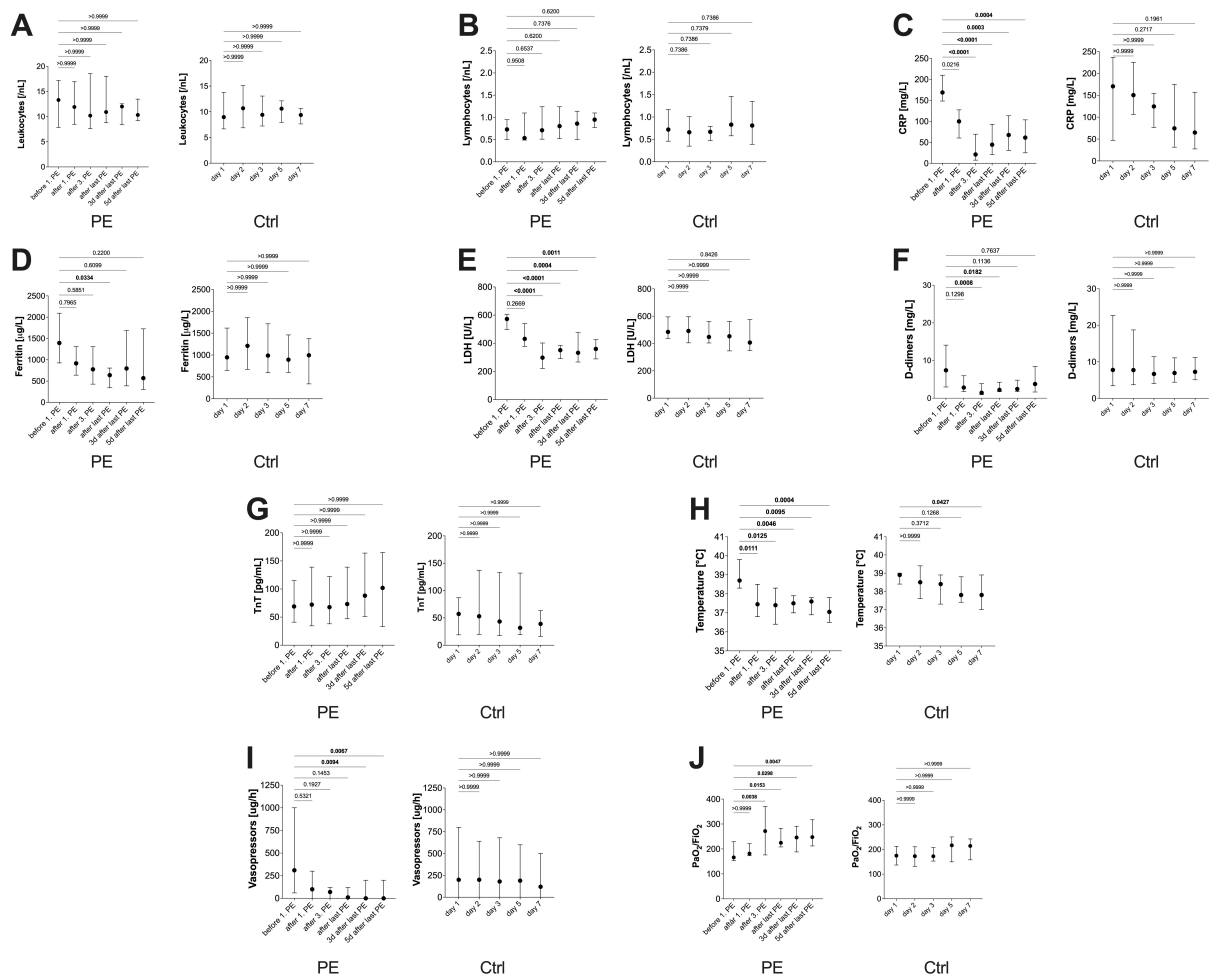

**Figure S2.** Laboratory (A-G) and clinical (H-J) parameters in relation to plasma exchange procedure (PE) and disease course in a control group on standard care (Ctrl). *CRP* C-reactive protein, *Ctrl* control group, *FiO<sub>2</sub>* fraction of inspired oxygen, *LDH* lactate dehydrogenase, *PaO<sub>2</sub>* partial pressure of arterial oxygen, *PE* plasma exchange group, *TnT* troponin T. Results are given as median and 95% confidence interval. Kruskal-Wallis test was used for statistical analyses. Bold values are statistically significant for  $p \leq 0.05$ .

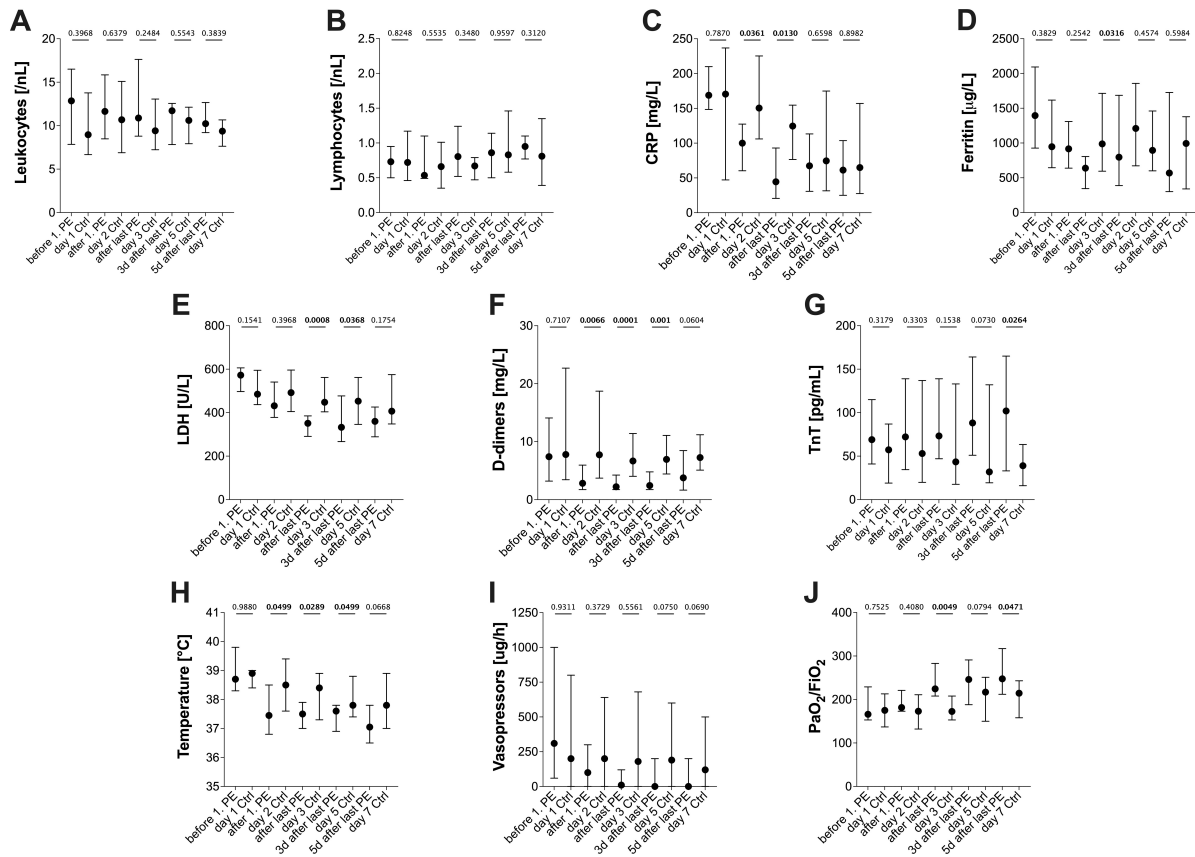

**Figure S3.** Comparison of time-matched laboratory (A-G) and clinical (H-J) parameters between patients treated with plasma exchange (PE) and controls on standard care (Ctrl). *CRP* C-reactive protein, *Ctrl* control group, *FiO<sub>2</sub>* fraction of inspired oxygen, *LDH* lactate dehydrogenase, *PaO<sub>2</sub>* partial pressure of arterial oxygen, *PE* plasma exchange group, *TnT* troponin T. Results are given as median and 95% confidence interval. Kruskal-Wallis test was used for statistical analyses. Bold values are statistically significant for  $p \leq 0.05$ .

**Table S1.** Correlation analysis of parameters after last plasma exchange and future clinical improvement in patients treated with plasma exchange.

| Parameters                               | PaO <sub>2</sub> / FiO <sub>2</sub> after last PE [mmHg] |                |                    | PaO <sub>2</sub> / FiO <sub>2</sub> 3d after last PE [mmHg] |                |                    | PaO <sub>2</sub> / FiO <sub>2</sub> 5d after last PE [mmHg] |                |                    |
|------------------------------------------|----------------------------------------------------------|----------------|--------------------|-------------------------------------------------------------|----------------|--------------------|-------------------------------------------------------------|----------------|--------------------|
|                                          | r                                                        | 95% CI         | p-value            | r                                                           | 95% CI         | p-value            | r                                                           | 95% CI         | p-value            |
| <b>CRP after last PE [mg/L]</b>          | -0.66                                                    | -0.82 to -0.42 | <b>&lt; 0.0001</b> | -0.72                                                       | -0.85 to -0.51 | <b>&lt; 0.0001</b> | -0.54                                                       | -0.74 to -0.24 | <b>0.001</b>       |
| <b>LDH after last PE [U/l]</b>           | -0.71                                                    | -0.85 to -0.49 | <b>&lt; 0.0001</b> | -0.74                                                       | -0.86 to -0.54 | <b>&lt; 0.0001</b> | -0.83                                                       | -0.91 to -0.68 | <b>&lt; 0.0001</b> |
| <b>D-Dimers after last PE [mg/L]</b>     | -0.76                                                    | -0.87 to -0.57 | <b>&lt; 0.0001</b> | -0.60                                                       | -0.78 to -0.33 | <b>&lt; 0.0001</b> | -0.26                                                       | -0.55 to 0.09  | 0.131              |
| <b>Vasopressors after last PE [µg/h]</b> | -0.49                                                    | -0.71 to -0.19 | <b>0.002</b>       | -0.51                                                       | -0.72 to -0.21 | <b>0.001</b>       | -0.70                                                       | -0.84 to -0.47 | <b>&lt; 0.0001</b> |

*CRP* C-reactive protein, *FiO<sub>2</sub>* fraction of inspired oxygen, *LDH* lactate dehydrogenase, *PaO<sub>2</sub>* partial pressure of arterial oxygen, *PE* plasma exchange. Spearman's correlation analysis was used for statistical analyses. Bold values are statistically significant for  $p \leq 0.05$ .
